# Supplementary material for: The reproductive pattern and potential of free ranging female wild boars (Sus scrofa) in Sweden
Source: PubMed Central journal article supplement (PMC5539618; doi:10.1186/s13028-017-0321-0), 2017-08-01

Map of Sweden highlighting the regions where female wild boars were sampled.

a) Skåne, b) Blekinge, c) Södermanland, d) Uppland

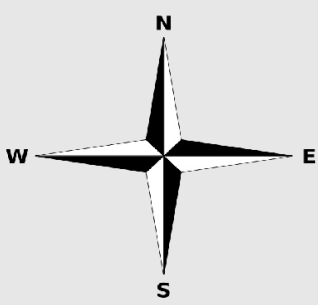

200 km

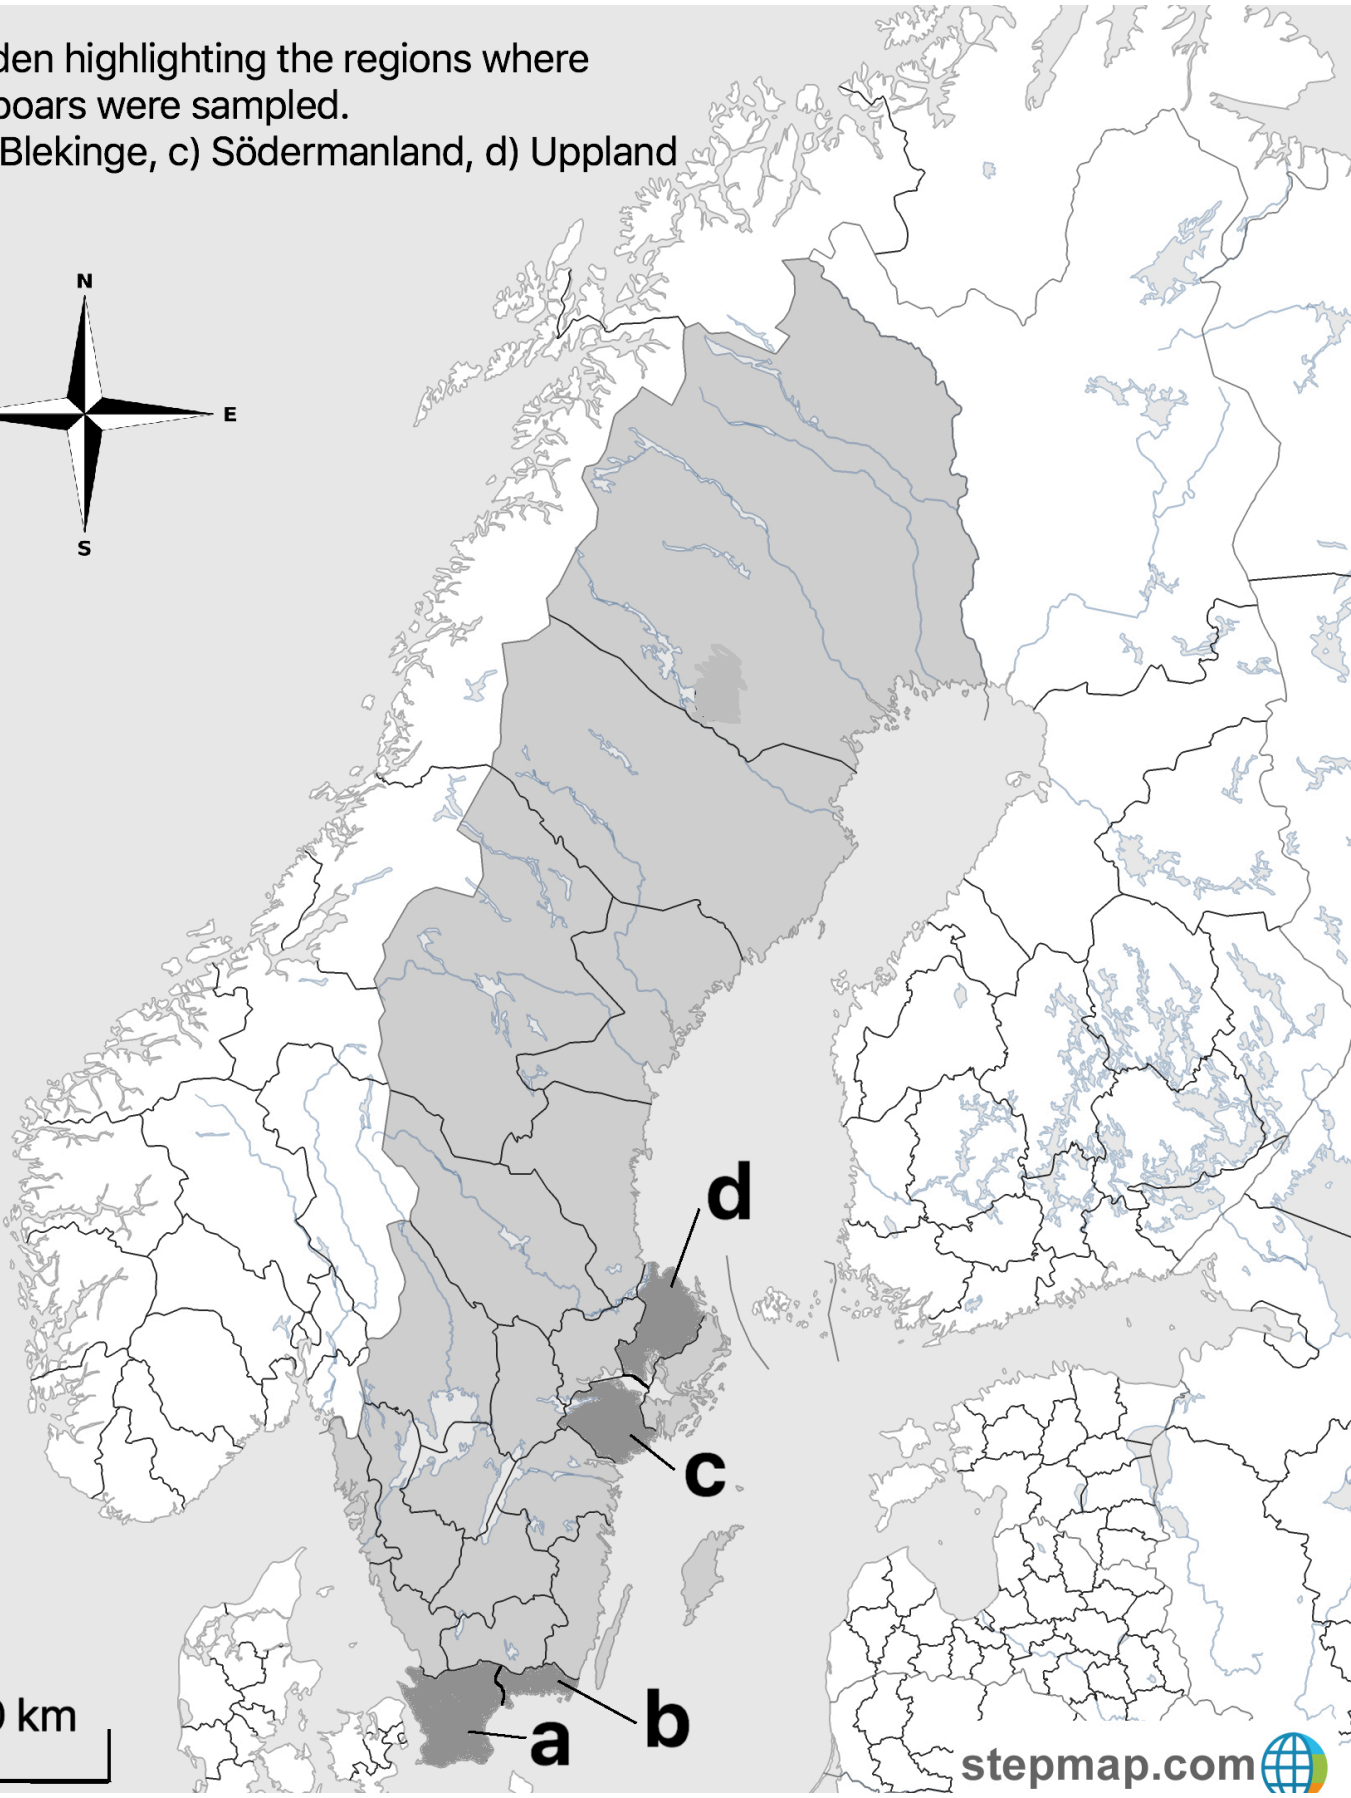

Supplement: 13028_2017_321_MOESM1_ESM.pdf [file 13028_2017_321_MOESM1_ESM.pdf]
